# Supplementary material for: An Effect and Less Spraying Control Method Successfully Controls Botrytis cinerea on Grapes in China
Source: MDPI journal article supplement (doi:10.3390/agronomy13102578), 2023-10-08
Supplement: s1 [file s1]

Archive with 1 entries (1 files):
- agronomy-2610445-supplementary.pdf
