# Supplementary material for: An Effect and Less Spraying Control Method Successfully Controls Botrytis cinerea on Grapes in China
Source: MDPI journal article supplement (doi:10.3390/agronomy13102578), 2023-10-08
Supplement: s1 [file s1 › agronomy-2610445-supplementary.pdf]

# An Effect and Less Spraying Control Method

## Successfully Controls *Botrytis cinerea* on Grapes in China

Hui Wang, Mei Liu, Wei Zhang, Ji-Ye Yan, Xing-Min Tang, Jorge Antonio Sanchez-

Molina, Xing-Hong Li

### S2 Material and Methods

#### S2.2 Inoculation Experiment

| Cultivar    | Treatment           | Pre-bloom                                                                           | Full-bloom                                                                          | 10 days after full-bloom                                                             | Bunch closure                                                                         | Veraison                                                                              |
|-------------|---------------------|-------------------------------------------------------------------------------------|-------------------------------------------------------------------------------------|--------------------------------------------------------------------------------------|---------------------------------------------------------------------------------------|---------------------------------------------------------------------------------------|
| JingXiangYu | Conidial suspension | 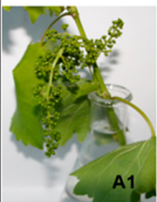  | 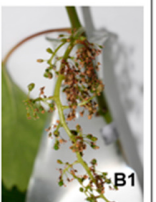  | 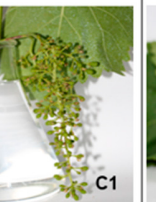  | 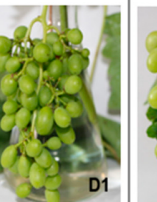  | 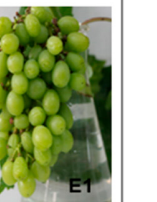  |
|             | Water control       | 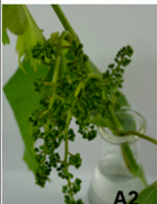 | 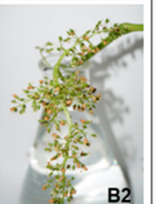 | 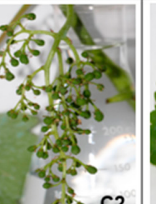 | 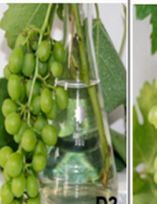 | 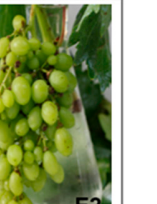 |
| RuiDuKeMei  | Conidial suspension | 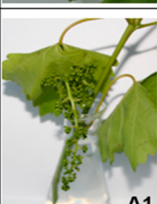 | 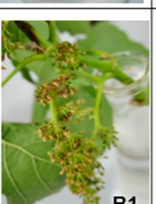 | 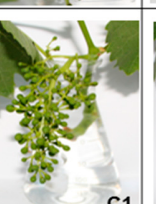 | 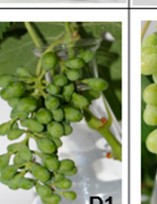 | 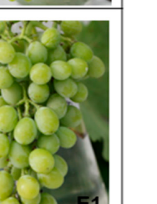 |
|             | Water control       | 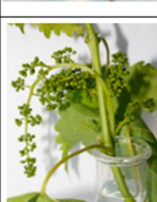 | 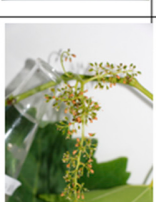 | 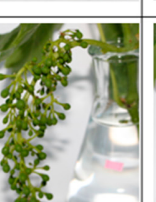 | 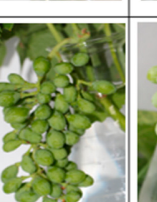 | 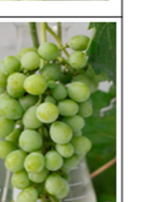 |

**Supplementary Table S1.** The treated fruit clusters and inflorescences of two cultivars (JingXiangYu and RuiDuKeMei) by conidial suspension (1) and water (2) in the in-vitro inoculation experiment over five grape growth stages (A: pre-bloom; B: full-bloom; C: 10 days after full-bloom; D: bunch closure and E: veraison) in 2015

S1 2.4 Weather condition

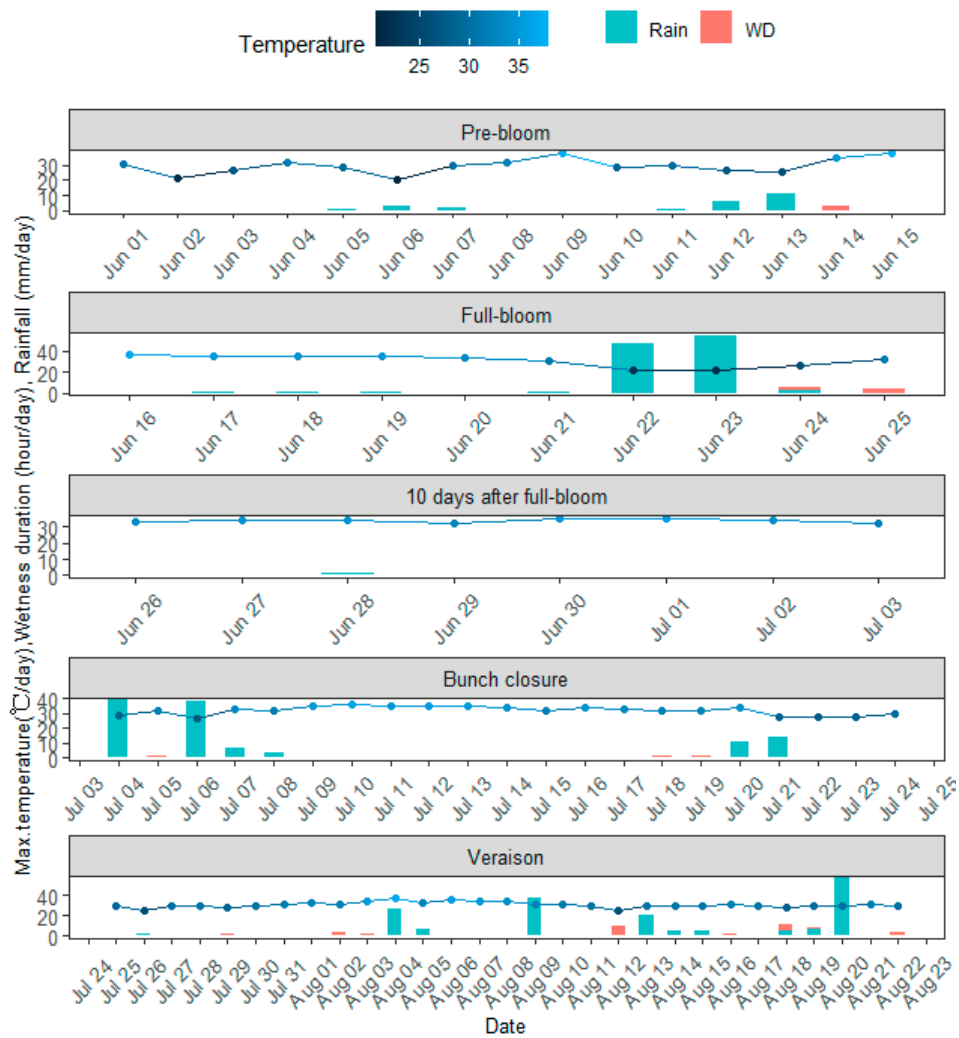

Supplementary Figure S1. Climate factors for the inoculations at Wenyi farm in the five stages.

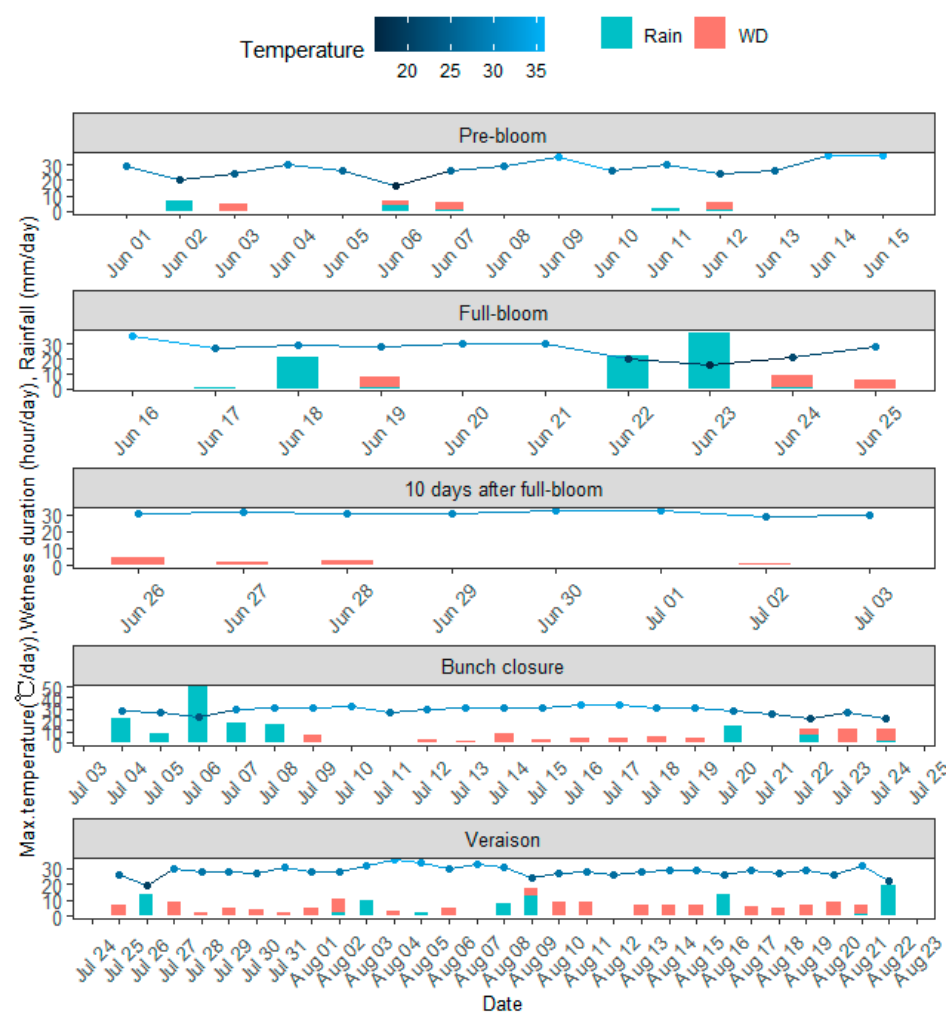

**Supplementary Figure S2.** Climate factors for the inoculations at Beijing Grape and Wine Research Institute in the five stages.

## S3 Results

### S3.1 Inoculation in-vitro and in field

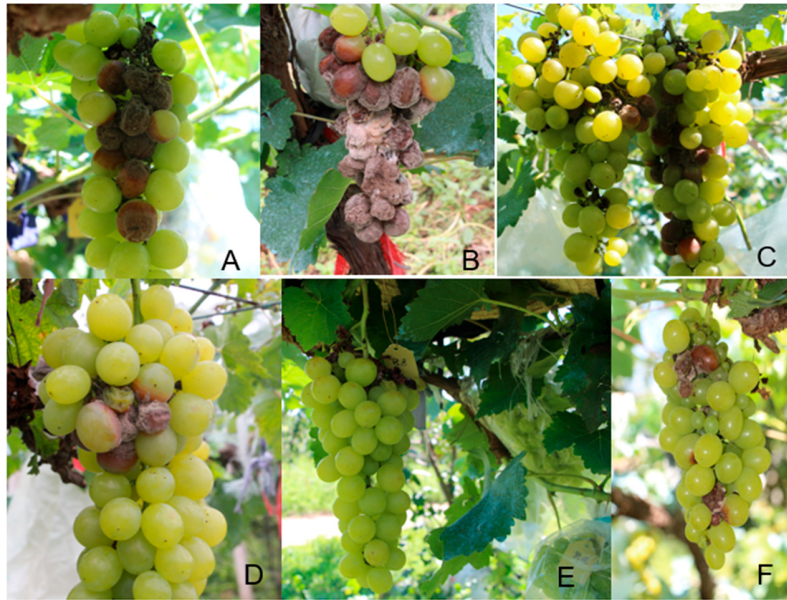

**Supplementary Figure S3.** Inoculated fruit clusters (A-E) and water control group (F) of JingXiangYu cultivar at harvest (22rd Aug) in field inoculation experiment over five grape growth stages (A: pre-bloom; B: full-bloom; C: 10 days after full-bloom; D: bunch closure and E: veraison) in 2015

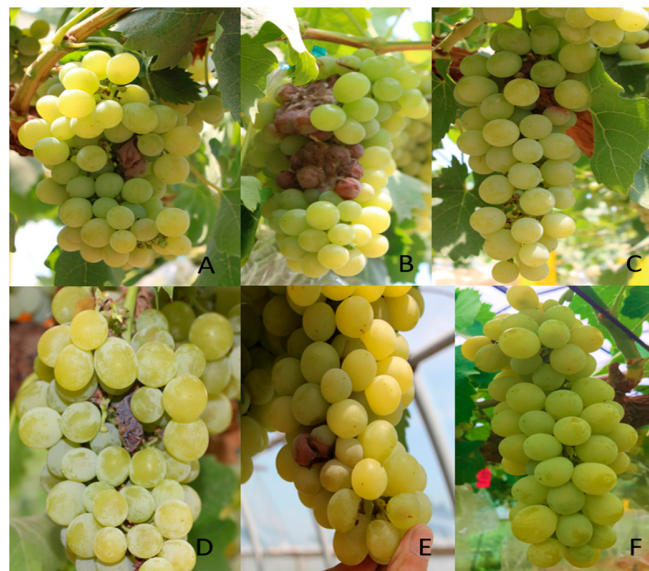

**Supplementary Figure S4.** Inoculated fruit clusters (A-E) and water control group (F) of RuiDuKeMei cultivar at harvest (22rd Aug) in field inoculation experiment over five grape growth stages (A: pre-bloom; B: full-bloom; C: 10 days after full-bloom; D: bunch closure and E: veraison) in 2015

### S3.2 Control experiments

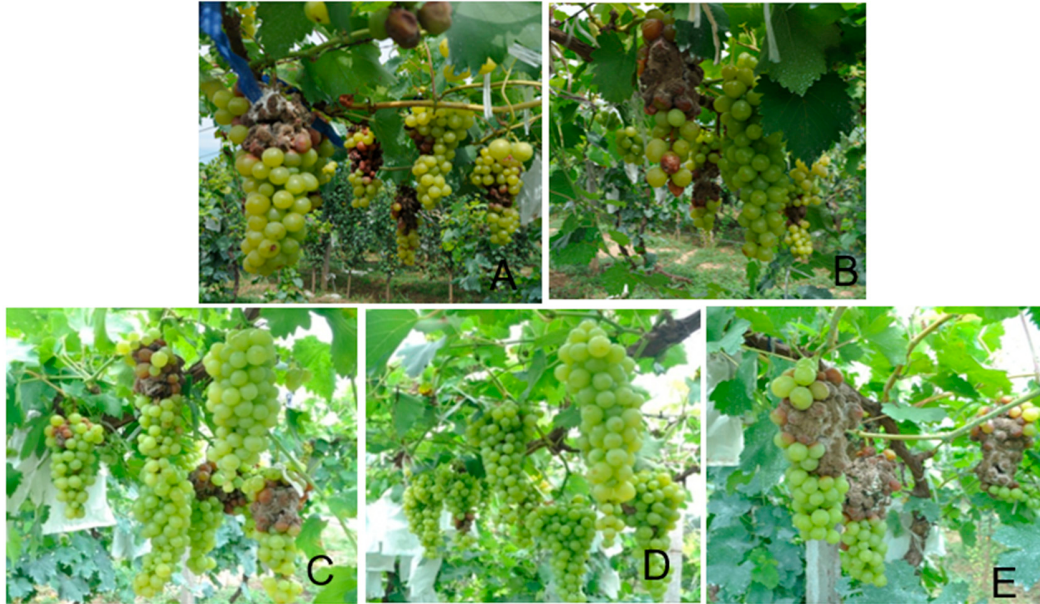

**Supplementary Figure S5.** Control effect of JingXiangYu cultivar applied ELSC method at harvest (27<sup>th</sup> Aug, 2015) with four kinds of fungicides (A: Difenoconazole + azoxystrobin, B: Pyraclostrobin, C: *Pythium oligandrum*, D: Fludioxonil) and water control group (E)
